# Supplementary material
Source: Springer Nature journal article supplement (https://www.springermedizin.de/resource/supplementary/12955_2004_159_MOESM3_ESM.pdf/9559952)

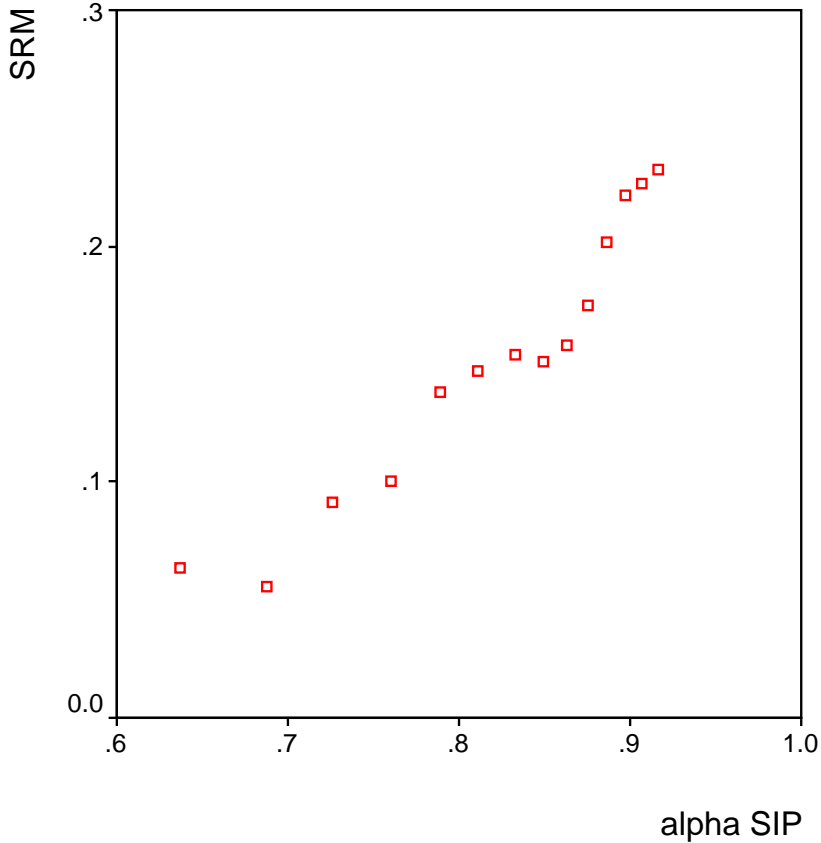

Supplement: MOESM3 [file 9559952]
